# Supplementary material for: Comparative analysis of the syncytiotrophoblast in placenta tissue and trophoblast organoids using snRNA sequencing
Source: eLife. 2025 May 27;13:RP101170. doi: 10.7554/eLife.101170 (PMC12113261; doi:10.7554/eLife.101170)
Supplement: Supplementary file 2. [file elife-101170-supp2.xlsx]

## Sheet: Sheet1
Cell/Nucleus type	Cell/Nucleus type abreviation	Markers
proliferative cytotrophoblast	CTBp	MKI67, CCNA2, PCNA, TOP2A
cytotrophoblast	CTB	CDH1, TP63, MET, TENM3, YAP1
cytotrophoblast cell column	CTB-CC	LPCAT1, NOTCH1, ITGA2, ITGB6
cytotrophoblast pre-fusion	CTB-pf	ERVFRD-1, ERVV-1, GREM2
syncytiotrophoblast	STB	ERVW-1, CYP19A1, MSFSD2A, TFAP2A
interstitial extravillous trophoblast	iEVT	PLAC8, SERPINE1, SERPINE2
enothelial extravillous trophoblast	eEVT	NCAM1, GGT1, PPFIA3
extravillous trophoblast	EVT	HLA-G, CXCR6, DIO2
vascular endothelial cell	VEC	PECAM1, CDH5
dendritic stem cell	DSC	PRL, IGFBP1, APOA1, SERPINA3
natural killer cell	NK	NKG7, NCAM1, GZMA, DPF3, NKG7, NCAM1, PRF1
T-cells	Tcell	CCL5, CD3D, CD69
macrophage	MAC	MS4A4A, STAB1, MS4A7, CD14
fibroblasts	Fibro	ACTA2, DLK1, EGFL6
