# Supplementary material for: Comparative analysis of the syncytiotrophoblast in placenta tissue and trophoblast organoids using snRNA sequencing
Source: eLife. 2025 May 27;13:RP101170. doi: 10.7554/eLife.101170 (PMC12113261; doi:10.7554/eLife.101170)
Supplement: Supplementary file 3. [file elife-101170-supp3.xlsx]

## Sheet: Sheet1
Ingredient	Composition
100 × N2	1x
50 × B27	1x
500 × Primocin	100 μg/ml
80 × NAC	1.25 mM
100 × L-glutamine	2 mM
10000 × A83-01	500 nM
10000 × CHIR99021	1.5 μM
2000 × recombinant hEGF	50 ng/ml
2000 × recombinant hR-spondin1	80 ng/ml
2000 × recombinant hFGF2	100 ng/ml
2000 × recombinant hHGF	50 ng/ml
100 × Nicotinamide(NTM)	10 mM
200 × Y-27632	5 μM
2000 × PGE2	2.5 μM
FBS	10% (vol/vol)
Advanced DMEM/F12	1x
