# Supplementary material for: Comparative analysis of the syncytiotrophoblast in placenta tissue and trophoblast organoids using snRNA sequencing
Source: eLife. 2025 May 27;13:RP101170. doi: 10.7554/eLife.101170 (PMC12113261; doi:10.7554/eLife.101170)
Supplement: Supplementary file 4. [file elife-101170-supp4.xlsx]

## Sheet: Sheet1
Ingredient	Composition
100 × L-glutamine	2 mM
β-mercaptoethenol	0.1 mM
200 × penicillin/streptomycin	0.5% (vol/vol)
BSA	225 μg/mL
100 × ITS-X supplement	1×
NRG1 (w/o in EVT m2)	100 ng/mL
A83-01	7.5 μM
Y-27632	2.5 μM
Knockout Serum Replacement	4% (vol/vol)
Advanced DMEM/F12	1×
