# Supplementary material for: Comparative analysis of the syncytiotrophoblast in placenta tissue and trophoblast organoids using snRNA sequencing
Source: eLife. 2025 May 27;13:RP101170. doi: 10.7554/eLife.101170 (PMC12113261; doi:10.7554/eLife.101170)
Supplement: Supplementary file 5. [file elife-101170-supp5.xlsx]

## Sheet: Sheet1
Target Gene	sgRNA pair	Sequence (5' → 3')	Target Strand	Target Exon
RYBP	#1	TCAGCTGGTGGCACAACAAG	Template strand	Exon 2
		ACCAGCTGAGAATTGATCCG	Coding strand	Exon 2
	#2	TCGGATCAATTCTCAGCTGG	Template strand	Exon 2
		TTGAACATTTCAGAAAACCT	Template strand	Exon 2
AFF1	#1	CCTGCTTCGAATTAGAGAGA	Template strand	Exon 2
		GAAATGCCTCTTTCTCTTGG	Template strand	Exon 2
	#2	CCTTCTCTCTAATTCGAAGC	Template strand	Exon 2
		AAATGCCTCTTTCTCTTGGT	Template strand	Exon 2
