# Supplementary material for: Comparative analysis of the syncytiotrophoblast in placenta tissue and trophoblast organoids using snRNA sequencing
Source: eLife. 2025 May 27;13:RP101170. doi: 10.7554/eLife.101170 (PMC12113261; doi:10.7554/eLife.101170)
Supplement: Supplementary file 6. [file elife-101170-supp6.xlsx]

## Sheet: Sheet1
Primer name	Sequence (5'->3')	PCR annealing temperature (°C)
RYBP_PF9	GCAGACTGTATGCTGTTTGCTT	60
RYBP_PR9	TACTGCACAGGGATGTGTATGTT
AFF1_PF5	ATGGCCCAGAGTGAATGCTT	60
AFF1_PR5	ACTCAATTCCCCTGTTGAGAAGA
